# Supplementary material
Source: publisher figshare collection journal article supplement (https://springernature.figshare.com/ndownloader/files/15350240)
Supplement: Supplementary file 1 [file 15350240]

**Characterization of a recombinant thermotolerant** **argonaute protein as an endonuclease by broad guide utilization**

Yuesheng Chong1, Qian Liu1, Fei Huang1, Dong Song1 and Yan Feng1*

1 State Key Laboratory of Microbial Metabolism, School of Life Sciences and Biotechnology, Shanghai Jiao Tong University, 800 Dongchuan Road, Shanghai 200240, China.

*** Corresponding author:**

Yan Feng, E-mail: [yfeng2009@sjtu.edu.cn](mailto:yfeng2009@sjtu.edu.cn);

Address: State Key Laboratory of Microbial Metabolism, School of Life Sciences and Biotechnology, Shanghai Jiao Tong University, 800 Dongchuan Road, Shanghai 200240, China.

**Co-authors:**

Yuesheng Chong, E-mail: [116080910082@sjtu.edu.cn](mailto:116080910082@sjtu.edu.cn);

Qian Liu, E-mail: [maomaoliu84@126.com](mailto:maomaoliu84@126.com);

Fei Huang, E-mail: [feihuang@sjtu.edu.cn](mailto:feihuang@sjtu.edu.cn);

Dong Song, E-mail: [dongsong@sjtu.edu.cn](mailto:dongsong@sjtu.edu.cn)

Address: State Key Laboratory of Microbial Metabolism, School of Life Sciences and Biotechnology, Shanghai Jiao Tong University, 800 Dongchuan Road, Shanghai 200240, China.


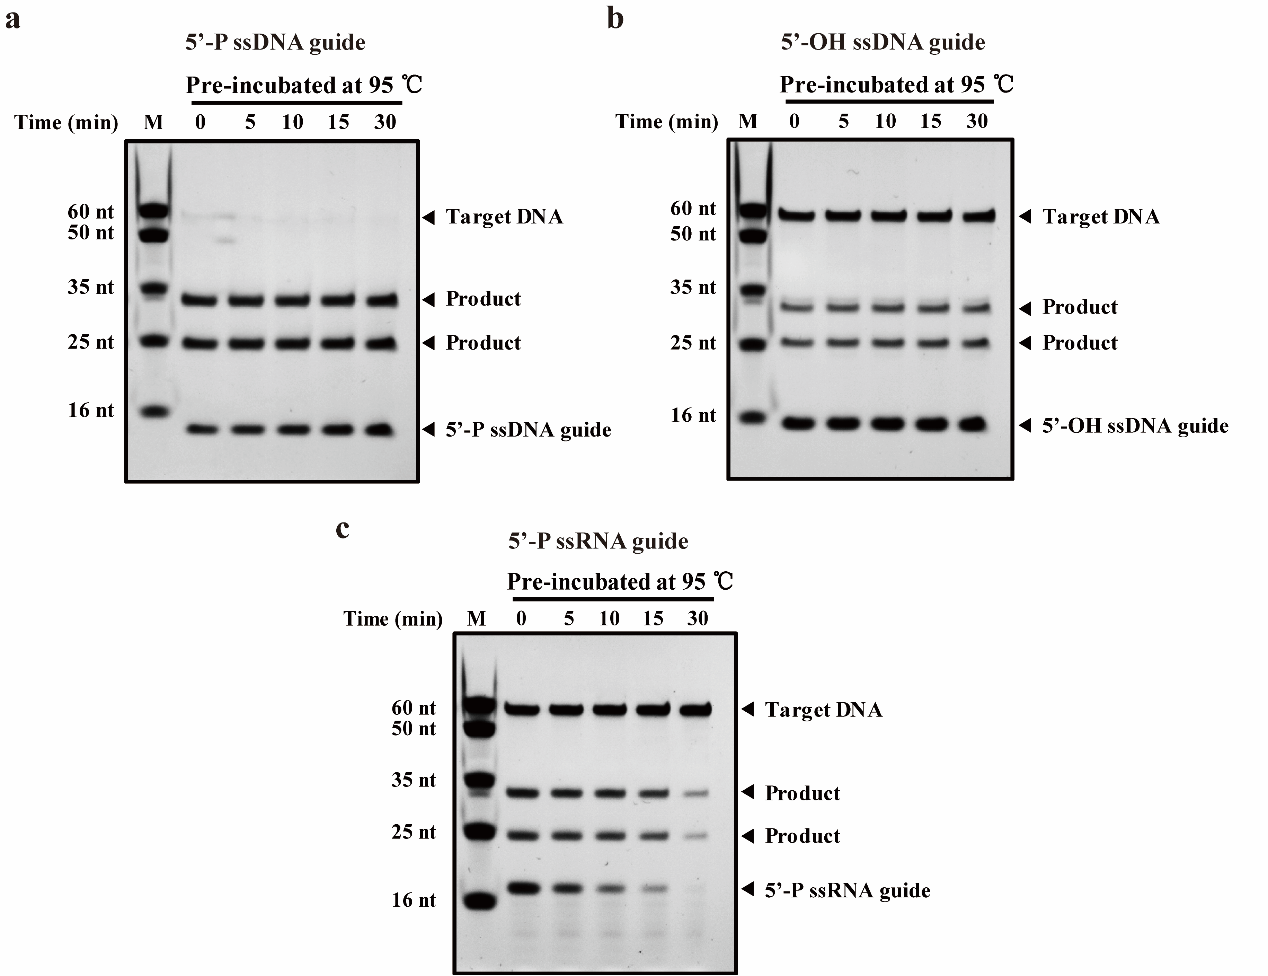


**Fig. S1** The stability of varied guides at high temperature. The 5’-P ssDNA guide (**a**), 5’-OH ssDNA guide (**b**), and 5’-P ssRNA guide (**c**) were pre-incubated at 95 °C for different times, respectively, prior to the cleavage of ssDNA target at 80 °C for 30 min. M: ssDNA marker. nt: nucleotide.


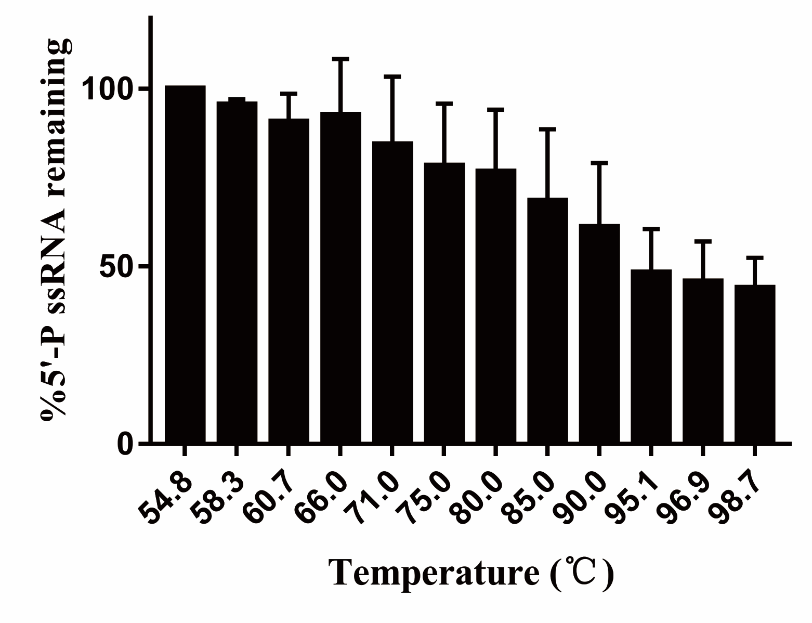


**Fig. S2** Analysis of the relative amount of the 5’-P ssRNA guide in the cleavage reaction for ssDNA target at various temperatures for 30 min.
